# Supplementary material for: Impaired phagocytosis of apoptotic cells causes accumulation of bone marrow-derived macrophages in aged mice
Source: PubMed Central journal article supplement — BMB Rep. 2017 Jan 31;50(1):43–8. doi: 10.5483/BMBRep.2017.50.1.167 (PMC5319664; doi:10.5483/bmbrep.2017.50.1.167), 2017-01-31
Supplement: bmb-50-043_suppl.pdf [file bmb-50-043_suppl.pdf]

# Supplementary Figure 1

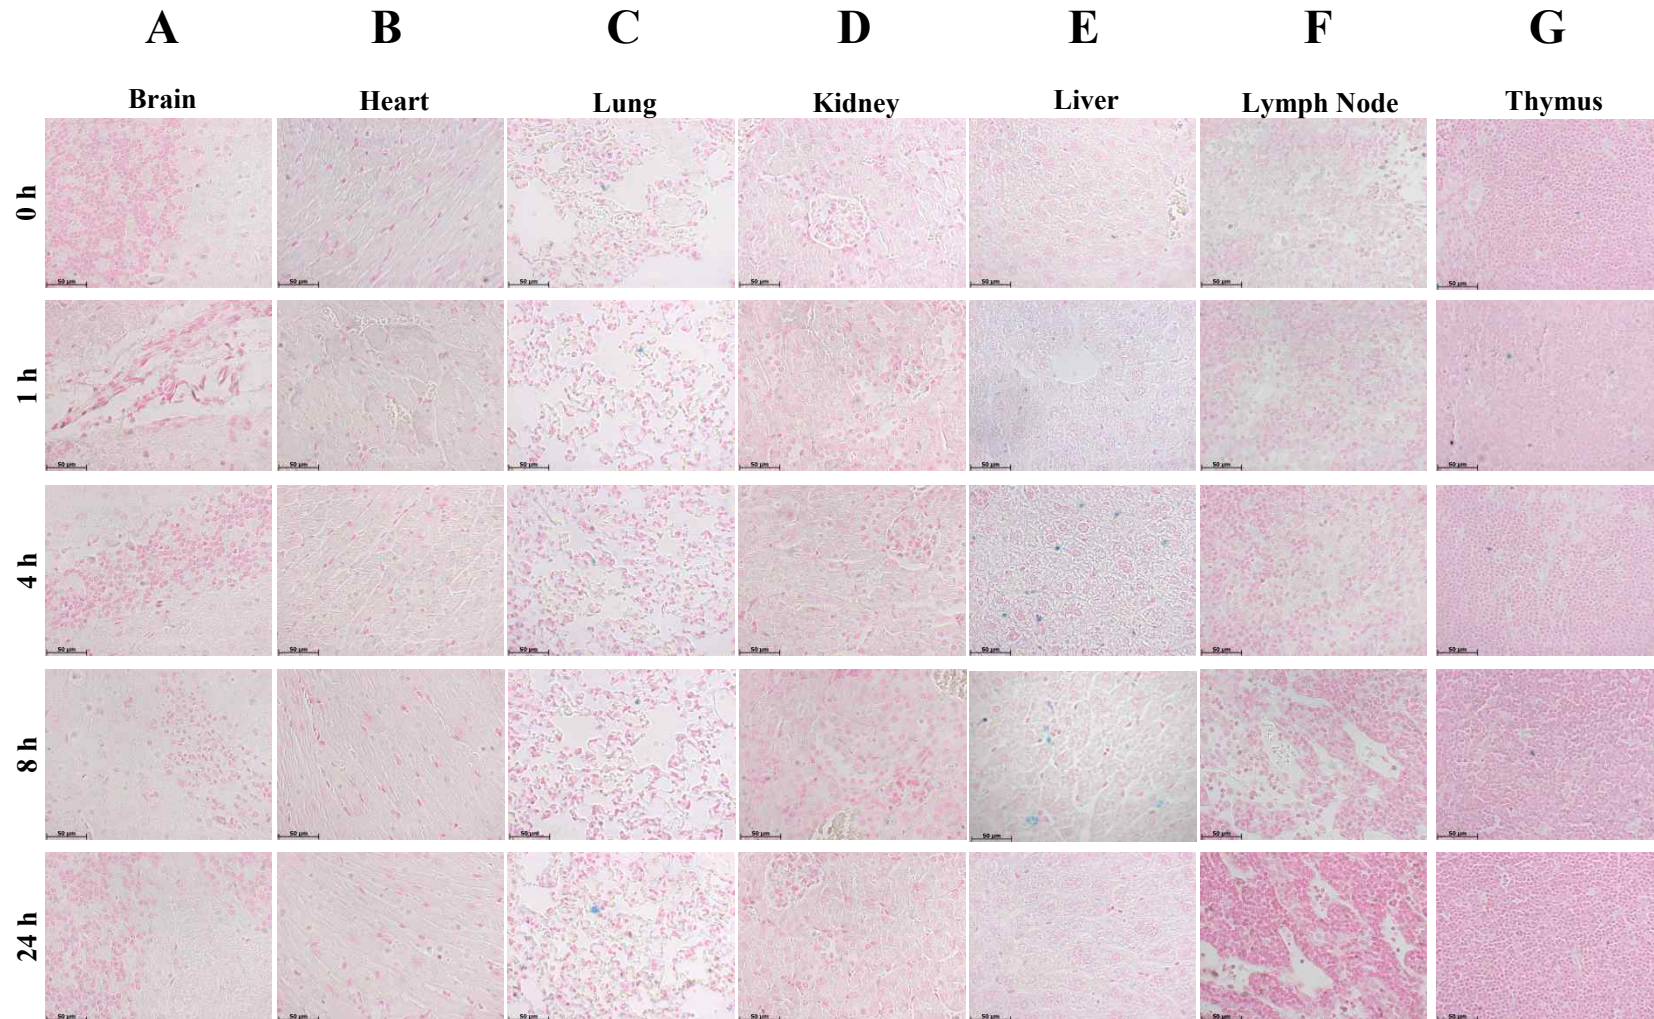

Supplementary Table 1. Primers used for qRT-PCR

| Gene          | GenBank accession no. | Primer  | Primer sequences             | Gene          | GenBank accession no. | Primer  | Primer sequences               |
|---------------|-----------------------|---------|------------------------------|---------------|-----------------------|---------|--------------------------------|
| CD19          | NM_009844             | Forward | 5'- GACCCITTTGCTTCCCAAA      | CD74          | NM_001042605          | Forward | 5'- ACATGACCAGGACCATGTGA       |
|               |                       | Reverse | 5'- CTCCCTCTCATCCACACAA      |               |                       | Reverse | 5'- CTGGGAAGTCCCTTCAG          |
| CD72          | NM_007654             | Forward | 5'- CTCTGTGAACCTGCTGCTCTCA   | CD36          | NM_007643             | Forward | ATACAGAGTTCGTTATCTAGCCAAGGA    |
|               |                       | Reverse | 5'- ACGAGAAGGCCAAGCAAGAA     |               |                       | Reverse | CCATTGGGCTGTACAAAAGACA         |
| CD74          | NM_001042605          | Forward | 5'- ACATGACCAGGACCATGTGA     | CD31          |                       | Forward | 5'-TACTGCAGGATCGGCAAA          |
|               |                       | Reverse | 5'- CTGGGAAGTCCCTTCAG        |               |                       | Reverse | 5'-ATACTGGGCTTCGAGGACATT       |
| CD79A         | NM_007655             | Forward | 5'- GCCTCTCCTCTCTCTTGTGAT    | ARG-1         | NM_007482.2           | Forward | 5'-GAACTCAACGGGAGGTAACC        |
|               |                       | Reverse | 5'- AAGTTCACCGTCAGGATGGT     |               |                       | Reverse | 5'-TTTTCATGTGGCGATTAC          |
| CD79B         | NM_008339             | Forward | 5'- CTGGGATGGAGGAATCACA      | F4/80         | NM_153100.1           | Forward | 5'-GCCTATTATCTATACCTCCAGCACATC |
|               |                       | Reverse | 5'- TGTCGGAAGAGTCACTATGCTTCA |               |                       | Reverse | 5'-TCCATCTCCATCCTCCACATCAG     |
| HLA-DRB1      | NM_010382             | Forward | 5'- AGCCCTGGAACACACAA        | CD68          | NM_009853             | Forward | 5'- ATGGGCTCCCTGTGTGT          |
|               |                       | Reverse | 5'- TCCGGAACCATCTGACTCAA     |               |                       | Reverse | 5'- GGCCTTTTGTGAGGACAGTCT      |
| HLA-DQB1      | NM_207105             | Forward | 5'- CATGGGCGAGTGCTACTTCA     | CD64          | NM_010186             | Forward | 5'-TTGGAGATGACATGTGGCTCTAA     |
|               |                       | Reverse | 5'- ACGTACTCCTCCGGTTGTAGA    |               |                       | Reverse | 5'-CAGCCTGGTGGCATTAAACC        |
| CIITA         | NM_001243760          | Forward | 5'- GGTGTCCTCGGTGTGATG       | CD14          | NM_009841.3           | Forward | 5'-GCTCAACTTTCTCGGAACA         |
|               |                       | Reverse | 5'- GTTCCACTGAGGCGACTTC      |               |                       | Reverse | 5'-TCGCCAATTCAAGGATTGTC        |
| C1QC          | NM_007574             | Forward | 5'- GCGATGAGGTGTGGCTATCA     | C1QA          | NM_007572             | Forward | 5'- TGCGAGTGTCTGGTGACA         |
|               |                       | Reverse | 5'- GGAAACCAGAGAAGACGCTGTT   |               |                       | Reverse | 5'- GGTCCGATCAAACTGGATGCT      |
| CHST1         | NM_023850             | Forward | 5'- GCTCAGCTGGGCTACAAGATG    | C1QB          | NM_009777             | Forward | 5'- TCGTTCGAAAAGGTGATCA        |
|               |                       | Reverse | 5'- GGAAGTCACGCTCCTCCACTA    |               |                       | Reverse | 5'- AGGCCAGGCACCTTGCA          |
| IL7R          | NM_008372             | Forward | 5'- CGATCCATCCCCATAACGA      | HLA-DOB-H2-OB | NM_010389             | Forward | 5'- ACAGGCAACCCAGTGAAGT        |
|               |                       | Reverse | 5'- GGGTTCTGGAGTTTCAAGGT     |               |                       | Reverse | 5'- TTGTGTTTGACCTGAGCAAGTG     |
| HLA-A         | NM_010391             | Forward | 5'- CTGATGCTGTGGCCATCA       | C1QC          | NM_007574             | Forward | 5'- GCGATGAGGTGTGGCTATCA       |
|               |                       | Reverse | 5'- TCCCCTTTTTTCTACCTGTGTTT  |               |                       | Reverse | 5'- GGAAACCAGAGAAGACGCTGTT     |
| HLA-B         | NM_008199             | Forward | 5'- GGTTCATCTCTGCGTACGT      | HLA-B-H2-Q6   | NM_207648             | Forward | 5'- ACATCGCTGCGGTATTCC         |
|               |                       | Reverse | 5'- GCGGCTCAGATCTCGGATT      |               |                       | Reverse | 5'- TCCACGTAGCCGACGATAATG      |
| HLA-DOB-H2-OB | NM_010389             | Forward | 5'- ACAGGCAACCCAGTGAAGT      | HLA-DQB1      | NM_207105             | Forward | 5'- CATGGGCGAGTGCTACTTCA       |
|               |                       | Reverse | 5'- TTGTGTTTGACCTGAGCAAGTG   |               |                       | Reverse | 5'- ACGTACTCCTCCGGTTGTAGA      |
| HLA-B-H2-Q6   | NM_207648             | Forward | 5'- ACATCGCTGCGGTATTCC       | HLA-A-H2-Q7   | NM_001198560          | Forward | 5'- AGCCCTCAGTCTCTTAGACAACA    |
|               |                       | Reverse | 5'- TCCACGTAGCCGACGATAATG    |               |                       | Reverse | 5'- GCTGGGCTCCACAGTTCTT        |
| HLA-A-H2-Q7   | NM_001198560          | Forward | 5'- AGCCCTCAGTCTCTTAGACAACA  | HLA-DRB1      | NM_010382             | Forward | 5'- AGCCCTGGAACACACAA          |
|               |                       | Reverse | 5'- GCTGGGCTCCACAGTTCTT      |               |                       | Reverse | 5'- TCCGGAACCATCTGACTCAA       |
| POU2AF1       | NM_011136             | Forward | 5'- GAAAGCAGCCAGTCACAT       | HLA-B         | NM_008199             | Forward | 5'- GGTTCATCTCTGTGGTACGT       |
|               |                       | Reverse | 5'- GAGCATGGCTGTGACAGGAT     |               |                       | Reverse | 5'- GCGGCTCAGATCTCGGATT        |
| SPIB          | NM_019866             | Forward | 5'- CGCAAGCGCATGACGTATC      | HLA-A         | NM_010391             | Forward | 5'- CTGATGCTGTGGCCATCA         |
|               |                       | Reverse | 5'- GCGTTTGACCTGCGGATT       |               |                       | Reverse | 5'- TCCCCTTTTTTCTACCTGTGTTT    |
| CD22          | NM_001043317          | Forward | 5'- CGCCACAAGACTGAGAAGGA     | BLNK          | NM_008528             | Forward | 5'- TTCCACAGTCTCCATTAATTC      |
|               |                       | Reverse | 5'- CTATTCTGTTCCCGAAGTGTACTC |               |                       | Reverse | 5'- ACAGGCCGCCAGCATACCA        |
| Tnfrsf13c     | NM_028075             | Forward | 5'- TTCAGAAGGAGTCCAGCAAGAGT  | MAPK13        | NM_011950             | Forward | 5'- CCCTTCGGAGTCCCATGAT        |
|               |                       | Reverse | 5'- CAGGCCCCAGGAGATG         |               |                       | Reverse | 5'- TGAATTCATCCCATGATCTT       |
| Tnfrsf13b     | NM_021349             | Forward | 5'- GAGCCAGCGCACCTGTACA      | CEBPD         | NM_007679             | Forward | 5'- CGACTTCAGCGCATCATTTG       |
|               |                       | Reverse | 5'- CAGGCCCCAGGAGATG         |               |                       | Reverse | 5'- TGAAGAGTCCGGCAAGAGT        |
